# Supplementary material for: Future Retreat of Great Aletsch Glacier and Hintereisferner – application of a full-Stokes model to two valley glaciers in the European Alps
Source: Copernicus journal article supplement (doi:10.5194/egusphere-2025-3150), 2025-08-20
Supplement: Supplementary file 1 [file egusphere-2025-3150-supplement-version1.pdf]

# Supplement of: Future Retreat of Great Aletsch Glacier and Hintereisferner – an East-West comparison of two valley glaciers in the Alps

Martin Rückamp<sup>1</sup>, Gong Cheng<sup>2</sup>, Karlheinz Gutjahr<sup>3</sup>, Marco Möller<sup>1</sup>, Petri Pelikka<sup>4</sup>, and Christoph Mayer<sup>1</sup>

<sup>1</sup>Bavarian Academy of Sciences and Humanities, Munich, Germany

<sup>2</sup>Department of Earth System Science, University of California, Irvine, California, USA

<sup>3</sup>Joanneum Research Forschungsgesellschaft mbH, Graz, Austria

<sup>4</sup>Helsinki Institute of Sustainability Science, Department of Geosciences and Geography, Finland

**Correspondence:** Martin Rückamp (martin.rueckamp@badw.de)

## 1 Figures

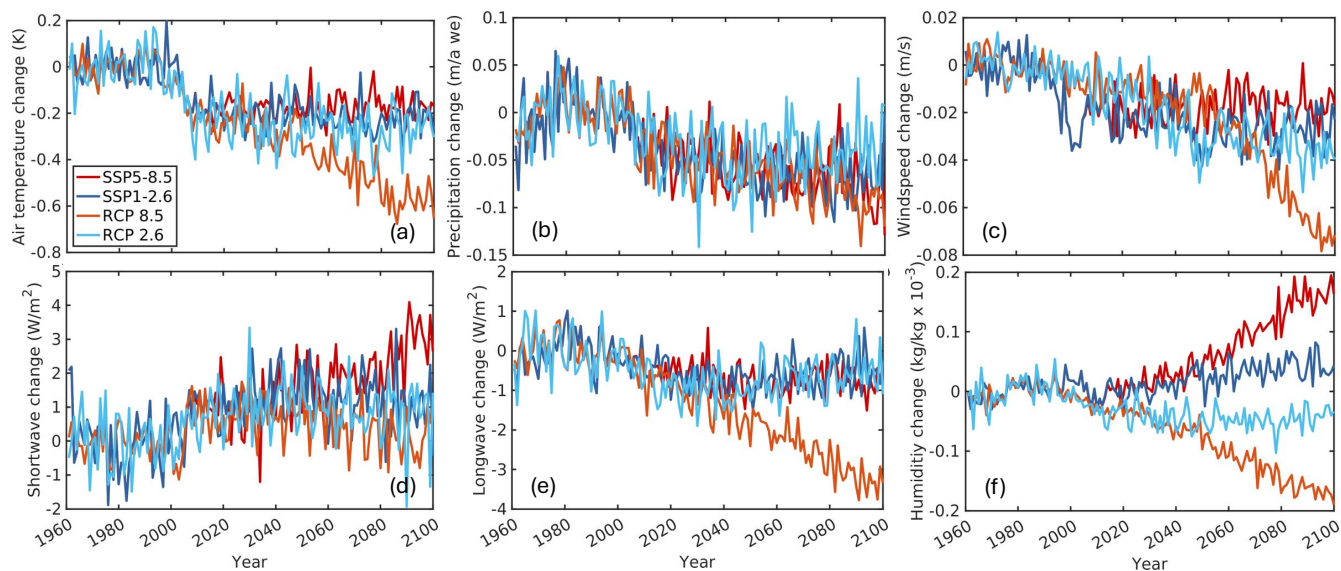

**Figure S1.** Ensemble mean differences of air temperature (a), precipitation (b), windspeed (c), shortwave radiation (d), longwave radiation (e) and humidity (f) anomalies between GAG and HEF of the downscaled GCM/RCM time series of the EURO-CORDEX (RCP scenarios) and ISIMIP3b ensembles (SSP scenarios).

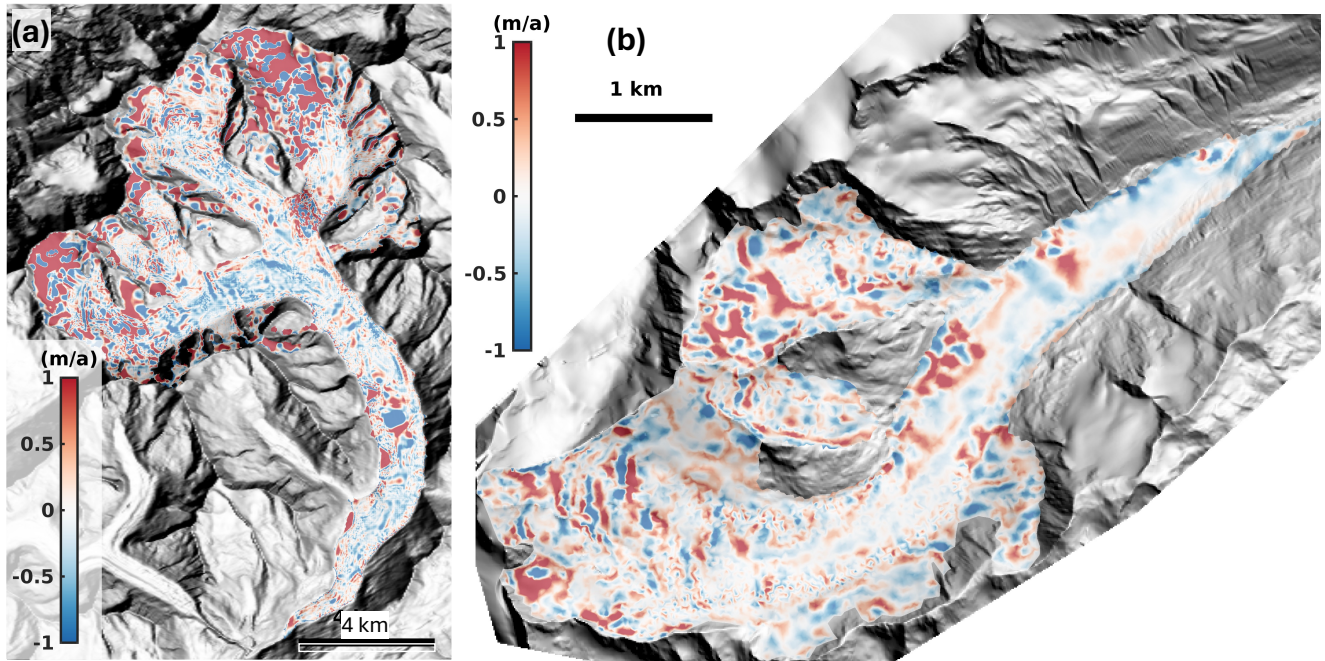

**Figure S2.** Difference of modelled and observed surface velocity of GAG (a) and HEF (b).

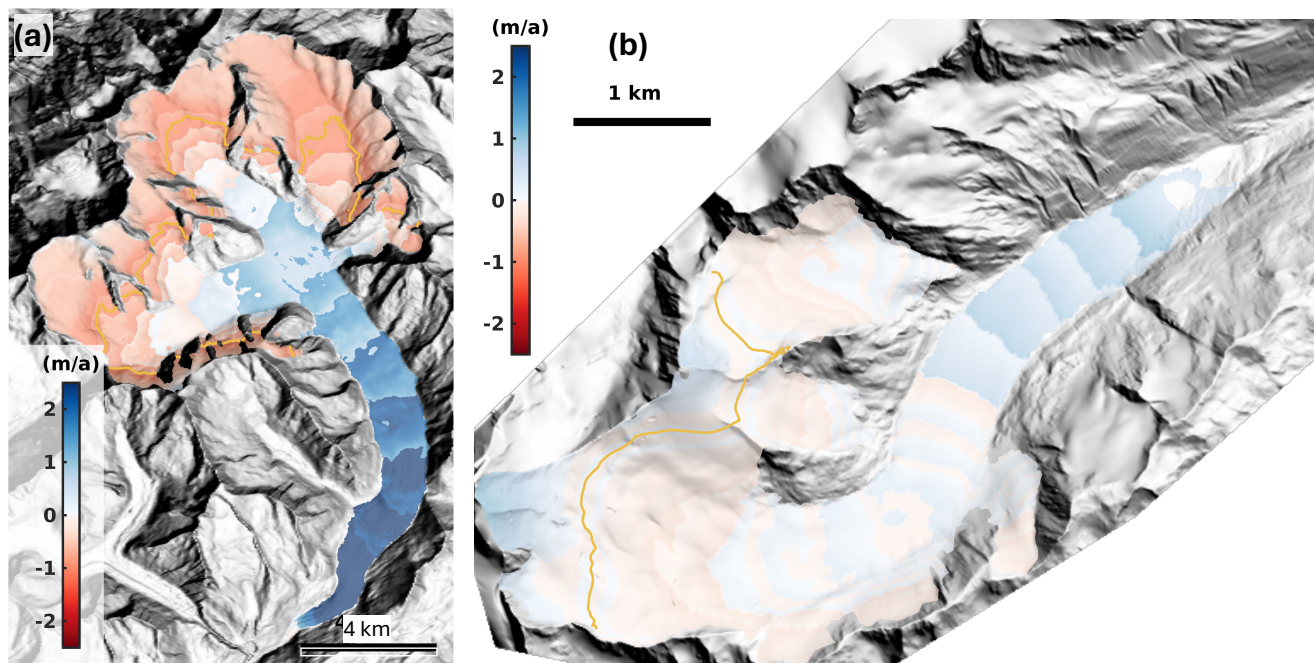

**Figure S3.** Difference of modelled and observed surface mass balance of GAG (a) and HEF (b). Note that observed SMB are provided in 100 and 50 m elevation bands for GAG and HEF, respectively.

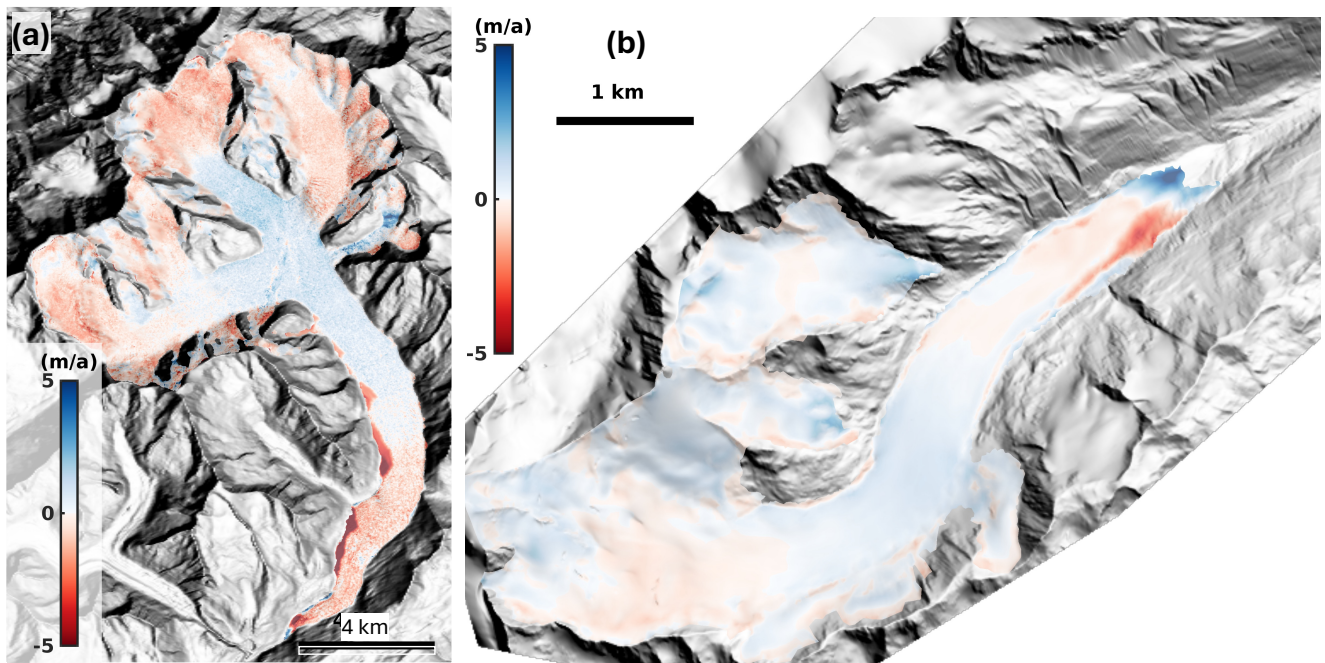

**Figure S4.** Difference of modelled and observed surface elevation changes of GAG (a) and HEF (b).

## 2 Tables

### 2.1 Hintereisferner (HEF)

**Table S1.** Overview of projected year when HEF are gone (i.e. volume drops below 1% of the initial volume) or mostly gone (i.e. volume drops below 10% of the initial volume) of the 22 RCP26 EURO-CORDEX RCM simulations utilized in this study. If a percentage value is given, the volume has not fallen below the corresponding threshold value in 2100 and the remaining glacier volume is given in comparison to 1997. The simulations marked in red are the ones with a future volume evolution that is closest to the multi-model median.

| GCM                   | realization | RCM        | version | RCP26       |       |
|-----------------------|-------------|------------|---------|-------------|-------|
|                       |             |            |         | mostly gone | gone  |
| CNRM-CERFACS-CNRM-CM5 | r1i1p1      | ALADIN63   | v2      | 2054        | 1.68% |
| MPI-M-MPI-ESM-LR      | r1i1p1      | RCA4       | v1a     | 2063        | 5.01% |
| NCC-NorESM1-M         | r1i1p1      | RCA4       | v1      | 2062        | 3.13% |
| NCC-NorESM1-M         | r1i1p1      | RegCM4-6   | v1      | 2064        | 3.58% |
| MPI-M-MPI-ESM-LR      | r1i1p1      | RegCM4-6   | v1      | 2064        | 4.5%  |
| MOHC-HadGEM2-ES       | r1i1p1      | RCA4       | v1      | 2047        | 2100  |
| ICHEC-EC-EARTH        | r12i1p1     | RCA4       | v1      | 2063        | 3.49% |
| MOHC-HadGEM2-ES       | r1i1p1      | RegCM4-6   | v1      | 2051        | 1.42% |
| MOHC-HadGEM2-ES       | r1i1p1      | RACMO22E   | v2      | 2047        | 2094  |
| MPI-M-MPI-ESM-LR      | r1i1p1      | REMO2009   | v1      | 2071        | 5.09% |
| MPI-M-MPI-ESM-LR      | r2i1p1      | REMO2009   | v1      | 2064        | 3.56% |
| ICHEC-EC-EARTH        | r12i1p1     | RACMO22E   | v1      | 2062        | 4.12% |
| ICHEC-EC-EARTH        | r12i1p1     | CCLM4-8-17 | v1      | 2073        | 5.38% |
| IPSL-IPSL-CM5A-LR     | r1i1p1      | REMO2015   | v1      | 2047        | 2066  |
| NOAA-GFDL-GFDL-ESM2G  | r1i1p1      | REMO2015   | v1      | 2068        | 5.34% |
| ICHEC-EC-EARTH        | r3i1p1      | HIRHAM5    | v2      | 2077        | 5.03% |
| CNRM-CERFACS-CNRM-CM5 | r1i1p1      | RACMO22E   | v2      | 2066        | 3.24% |
| NCC-NorESM1-M         | r1i1p1      | REMO2015   | v1      | 2056        | 2.72% |
| CNRM-CERFACS-CNRM-CM5 | r1i1p1      | REMO2015   | v2      | 2062        | 2.01% |
| MOHC-HadGEM2-ES       | r1i1p1      | HIRHAM5    | v2      | 2051        | 1.22% |
| MPI-M-MPI-ESM-LR      | r1i1p1      | RACMO22E   | v1      | 2063        | 4.47% |
| NCC-NorESM1-M         | r1i1p1      | RACMO22E   | v1      | 2065        | 3.34% |

**Table S2.** Overview of projected year when HEF are gone (i.e. volume drops below 1% of the initial volume) or mostly gone (i.e. volume drops below 10% of the initial volume) of the 65 RCP85 EURO-CORDEX RCM simulations utilized in this study. If a percentage value is given, the volume has not fallen below the corresponding threshold value in 2100 and the remaining glacier volume is given in comparison to 1997. The simulations marked in red are the ones with a future volume evolution that is closest to the multi-model median.

| GCM                   | realization | RCM               | version | RCP 85      |      |
|-----------------------|-------------|-------------------|---------|-------------|------|
|                       |             |                   |         | mostly gone | gone |
| ICHEC-EC-EARTH        | r12i1p1     | CCLM4-8-17        | v1      | 2062        | 2083 |
| MOHC-HadGEM2-ES       | r1i1p1      | CCLM4-8-17        | v1      | 2053        | 2065 |
| ICHEC-EC-EARTH        | r1i1p1      | RACMO22E          | v1      | 2053        | 2075 |
| CNRM-CERFACS-CNRM-CM5 | r1i1p1      | CCLM4-8-17        | v1      | 2063        | 2083 |
| MPI-M-MPI-ESM-LR      | r1i1p1      | CCLM4-8-17        | v1      | 2060        | 2084 |
| MOHC-HadGEM2-ES       | r1i1p1      | RACMO22E          | v2      | 2050        | 2062 |
| MPI-M-MPI-ESM-LR      | r2i1p1      | REMO2009          | v1      | 2051        | 2066 |
| MPI-M-MPI-ESM-LR      | r1i1p1      | REMO2009          | v1      | 2053        | 2071 |
| ICHEC-EC-EARTH        | r12i1p1     | RACMO22E          | v1      | 2054        | 2069 |
| ICHEC-EC-EARTH        | r12i1p1     | HIRHAM5           | v1      | 2058        | 2067 |
| CNRM-CERFACS-CNRM-CM5 | r1i1p1      | RACMO22E          | v2      | 2062        | 2080 |
| NCC-NorESM1-M         | r1i1p1      | REMO2015          | v1      | 2047        | 2068 |
| MPI-M-MPI-ESM-LR      | r1i1p1      | RACMO22E          | v1      | 2056        | 2067 |
| MOHC-HadGEM2-ES       | r1i1p1      | HIRHAM5           | v2      | 2049        | 2062 |
| ICHEC-EC-EARTH        | r3i1p1      | HIRHAM5           | v2      | 2062        | 2078 |
| NCC-NorESM1-M         | r1i1p1      | HIRHAM5           | v3      | 2054        | 2070 |
| ICHEC-EC-EARTH        | r1i1p1      | HIRHAM5           | v1      | 2058        | 2080 |
| ICHEC-EC-EARTH        | r3i1p1      | RACMO22E          | v1      | 2055        | 2074 |
| CNRM-CERFACS-CNRM-CM5 | r1i1p1      | HIRHAM5           | v2      | 2062        | 2079 |
| NCC-NorESM1-M         | r1i1p1      | RACMO22E          | v1      | 2049        | 2070 |
| MPI-M-MPI-ESM-LR      | r3i1p1      | REMO2015          | v1      | 2052        | 2066 |
| NCC-NorESM1-M         | r1i1p1      | COSMO-crCLIM-v1-1 | v1      | 2054        | 2070 |
| MPI-M-MPI-ESM-LR      | r1i1p1      | COSMO-crCLIM-v1-1 | v1      | 2057        | 2067 |
| MPI-M-MPI-ESM-LR      | r1i1p1      | HIRHAM5           | v1      | 2057        | 2073 |
| MPI-M-MPI-ESM-LR      | r2i1p1      | COSMO-crCLIM-v1-1 | v1      | 2061        | 2071 |
| MOHC-HadGEM2-ES       | r1i1p1      | COSMO-crCLIM-v1-1 | v1      | 2052        | 2064 |
| CNRM-CERFACS-CNRM-CM5 | r1i1p1      | REMO2015          | v2      | 2055        | 2066 |
| IPSL-IPSL-CM5A-MR     | r1i1p1      | REMO2015          | v1      | 2047        | 2057 |
| MPI-M-MPI-ESM-LR      | r3i1p1      | COSMO-crCLIM-v1-1 | v1      | 2059        | 2071 |
| IPSL-IPSL-CM5A-MR     | r1i1p1      | RACMO22E          | v1      | 2053        | 2061 |
| ICHEC-EC-EARTH        | r12i1p1     | COSMO-crCLIM-v1-1 | v1      | 2058        | 2072 |

**Table S2.** Continuation of Tab. S2

| GCM                   | realization | RCM               | version | RCP 85      |      |
|-----------------------|-------------|-------------------|---------|-------------|------|
|                       |             |                   |         | mostly gone | gone |
| IPSL-IPSL-CM5A-MR     | r1i1p1      | HIRHAM5           | v1      | 2054        | 2063 |
| ICHEC-EC-EARTH        | r1i1p1      | COSMO-crCLIM-v1-1 | v1      | 2059        | 2081 |
| ICHEC-EC-EARTH        | r3i1p1      | COSMO-crCLIM-v1-1 | v1      | 2058        | 2070 |
| CNRM-CERFACS-CNRM-CM5 | r1i1p1      | COSMO-crCLIM-v1-1 | v1      | 2068        | 2092 |
| ICHEC-EC-EARTH        | r12i1p1     | HadREM3-GA7-05    | v1      | 2051        | 2063 |
| CNRM-CERFACS-CNRM-CM5 | r1i1p1      | HadREM3-GA7-05    | v2      | 2050        | 2063 |
| MOHC-HadGEM2-ES       | r1i1p1      | HadREM3-GA7-05    | v1      | 2044        | 2053 |
| MPI-M-MPI-ESM-LR      | r1i1p1      | HadREM3-GA7-05    | v1      | 2047        | 2063 |
| NCC-NorESM1-M         | r1i1p1      | HadREM3-GA7-05    | v1      | 2045        | 2066 |
| MOHC-HadGEM2-ES       | r1i1p1      | ALADIN63          | v1      | 2049        | 2065 |
| CNRM-CERFACS-CNRM-CM5 | r1i1p1      | WRF381P           | v2      | 2057        | 2070 |
| MOHC-HadGEM2-ES       | r1i1p1      | WRF381P           | v1      | 2052        | 2065 |
| NCC-NorESM1-M         | r1i1p1      | WRF381P           | v1      | 2052        | 2071 |
| IPSL-IPSL-CM5A-MR     | r1i1p1      | WRF381P           | v1      | 2058        | 2073 |
| MPI-M-MPI-ESM-LR      | r1i1p1      | ALADIN63          | v1      | 2052        | 2069 |
| ICHEC-EC-EARTH        | r12i1p1     | WRF381P           | v1      | 2057        | 2078 |
| CNRM-CERFACS-CNRM-CM5 | r1i1p1      | ALADIN63          | v2      | 2054        | 2071 |
| MPI-M-MPI-ESM-LR      | r1i1p1      | WRF381P           | v1      | 2059        | 2077 |
| NCC-NorESM1-M         | r1i1p1      | ALADIN63          | v1      | 2048        | 2068 |
| MPI-M-MPI-ESM-LR      | r2i1p1      | RCA4              | v1      | 2053        | 2068 |
| NCC-NorESM1-M         | r1i1p1      | RCA4              | v1      | 2047        | 2067 |
| ICHEC-EC-EARTH        | r3i1p1      | RCA4              | v1      | 2054        | 2075 |
| ICHEC-EC-EARTH        | r1i1p1      | RCA4              | v1      | 2050        | 2069 |
| CNRM-CERFACS-CNRM-CM5 | r1i1p1      | RegCM4-6          | v2      | 2057        | 2078 |
| MPI-M-MPI-ESM-LR      | r3i1p1      | RCA4              | v1      | 2054        | 2069 |
| MPI-M-MPI-ESM-LR      | r1i1p1      | RCA4              | v1a     | 2053        | 2069 |
| MOHC-HadGEM2-ES       | r1i1p1      | RCA4              | v1      | 2044        | 2055 |
| IPSL-IPSL-CM5A-MR     | r1i1p1      | RCA4              | v1      | 2051        | 2061 |
| ICHEC-EC-EARTH        | r12i1p1     | RCA4              | v1      | 2055        | 2070 |
| CNRM-CERFACS-CNRM-CM5 | r1i1p1      | RCA4              | v1      | 2057        | 2078 |
| ICHEC-EC-EARTH        | r12i1p1     | RegCM4-6          | v1      | 2058        | 2081 |
| NCC-NorESM1-M         | r1i1p1      | RegCM4-6          | v1      | 2052        | 2075 |
| MPI-M-MPI-ESM-LR      | r1i1p1      | RegCM4-6          | v1      | 2054        | 2071 |
| MOHC-HadGEM2-ES       | r1i1p1      | RegCM4-6          | v1      | 2049        | 2061 |

**Table S3.** Overview of projected year when HEF are gone (i.e. volume drops below 1% of the initial volume) or mostly gone (i.e. volume drops below 10% of the initial volume) of the 10 SSP585 and SSP 126 ISIMIP3b GCM simulations utilized in this study. If a percentage value is given, the volume has not fallen below the corresponding threshold value in 2100 and the remaining glacier volume is given in comparison to 1997. The simulations marked in red are the ones with a future volume evolution that is closest to the multi-model median.

| GCM        | SSP 585     |      | SSP 126     |       |
|------------|-------------|------|-------------|-------|
|            | mostly gone | gone | mostly gone | gone  |
| CANESM5    | 2040        | 2048 | 2039        | 2052  |
| CNRM-CM6   | 2045        | 2053 | 2048        | 2073  |
| CNRM-ESM2  | 2047        | 2064 | 2044        | 2086  |
| EC-EARTH3  | 2032        | 2040 | 2036        | 2046  |
| GFDL-ESM4  | 2051        | 2064 | 2047        | 1.85% |
| IPSL-CM6A  | 2044        | 2052 | 2047        | 2075  |
| MIROC6     | 2043        | 2051 | 2037        | 2058  |
| MPI-ESM1-2 | 2051        | 2061 | 2051        | 3.24% |
| MRI-ESM2-0 | 2036        | 2043 | 2041        | 2059  |
| UKESM1     | 2033        | 2041 | 2035        | 2042  |

## 2.2 Great Aletsch Glacier (GAG)

**Table S4.** Overview of projected year when GAG are gone (i.e. volume drops below 1% of the initial volume) or mostly gone (i.e. volume drops below 10% of the initial volume) of the 22 RCP26 EURO-CORDEX RCM simulations utilized in this study. If a percentage value is given, the volume has not fallen below the corresponding threshold value in 2100 and the remaining glacier volume is given in comparison to 2011. The simulations marked in red are the ones with a future volume evolution that is closest to the multi-model median.

| GCM                   | realization | RCM        | version | RCP 26      |        |
|-----------------------|-------------|------------|---------|-------------|--------|
|                       |             |            |         | mostly gone | gone   |
| CNRM-CERFACS-CNRM-CM5 | rli1p1      | ALADIN63   | v2      | 26.18%      | 26.18% |
| MPI-M-MPI-ESM-LR      | rli1p1      | RCA4       | v1a     | 40.84%      | 40.84% |
| NCC-NorESM1-M         | rli1p1      | RCA4       | v1      | 31.3%       | 31.3%  |
| NCC-NorESM1-M         | rli1p1      | RegCM4-6   | v1      | 32.92%      | 32.92% |
| MPI-M-MPI-ESM-LR      | rli1p1      | RegCM4-6   | v1      | 38.06%      | 38.06% |
| MOHC-HadGEM2-ES       | rli1p1      | RCA4       | v1      | 21.68%      | 21.68% |
| ICHEC-EC-EARTH        | r12i1p1     | RCA4       | v1      | 35.18%      | 35.18% |
| MOHC-HadGEM2-ES       | rli1p1      | RegCM4-6   | v1      | 23.15%      | 23.15% |
| MOHC-HadGEM2-ES       | rli1p1      | RACMO22E   | v2      | 19.62%      | 19.62% |
| MPI-M-MPI-ESM-LR      | rli1p1      | REMO2009   | v1      | 36.83%      | 36.83% |
| MPI-M-MPI-ESM-LR      | r2i1p1      | REMO2009   | v1      | 34.61%      | 34.61% |
| ICHEC-EC-EARTH        | r12i1p1     | RACMO22E   | v1      | 37.05%      | 37.05% |
| ICHEC-EC-EARTH        | r12i1p1     | CCLM4-8-17 | v1      | 43.41%      | 43.41% |
| IPSL-IPSL-CM5A-LR     | rli1p1      | REMO2015   | v1      | 16.21%      | 16.21% |
| NOAA-GFDL-GFDL-ESM2G  | rli1p1      | REMO2015   | v1      | 39.62%      | 39.62% |
| ICHEC-EC-EARTH        | r3i1p1      | HIRHAM5    | v2      | 34.69%      | 34.69% |
| CNRM-CERFACS-CNRM-CM5 | rli1p1      | RACMO22E   | v2      | 30.2%       | 30.2%  |
| NCC-NorESM1-M         | rli1p1      | REMO2015   | v1      | 26.4%       | 26.4%  |
| CNRM-CERFACS-CNRM-CM5 | rli1p1      | REMO2015   | v2      | 24.03%      | 24.03% |
| MOHC-HadGEM2-ES       | rli1p1      | HIRHAM5    | v2      | 22.21%      | 22.21% |
| MPI-M-MPI-ESM-LR      | rli1p1      | RACMO22E   | v1      | 36.74%      | 36.74% |
| NCC-NorESM1-M         | rli1p1      | RACMO22E   | v1      | 31.74%      | 31.74% |

**Table S5.** Overview of projected year when GAG are gone (i.e. volume drops below 1% of the initial volume) or mostly gone (i.e. volume drops below 10% of the initial volume) of the 65 RCP85 EURO-CORDEX RCM simulations utilized in this study. If a percentage value is given, the volume has not fallen below the corresponding threshold value in 2100 and the remaining glacier volume is given in comparison to 2011. The simulations marked in red are the ones with a future volume evolution that is closest to the multi-model median.

| GCM                   | realization | RCM               | version | RCP 85      |        |
|-----------------------|-------------|-------------------|---------|-------------|--------|
|                       |             |                   |         | mostly gone | gone   |
| ICHEC-EC-EARTH        | r12i1p1     | CCLM4-8-17        | v1      | 2096        | 7.45%  |
| MOHC-HadGEM2-ES       | r1i1p1      | CCLM4-8-17        | v1      | 2080        | 2100   |
| ICHEC-EC-EARTH        | r1i1p1      | RACMO22E          | v1      | 2100        | 9.63%  |
| CNRM-CERFACS-CNRM-CM5 | r1i1p1      | CCLM4-8-17        | v1      | 2099        | 9.31%  |
| MPI-M-MPI-ESM-LR      | r1i1p1      | CCLM4-8-17        | v1      | 2096        | 7.75%  |
| MOHC-HadGEM2-ES       | r1i1p1      | RACMO22E          | v2      | 2089        | 4.43%  |
| MPI-M-MPI-ESM-LR      | r2i1p1      | REMO2009          | v1      | 2084        | 2.02%  |
| MPI-M-MPI-ESM-LR      | r1i1p1      | REMO2009          | v1      | 2088        | 3.25%  |
| ICHEC-EC-EARTH        | r12i1p1     | RACMO22E          | v1      | 2096        | 8.13%  |
| ICHEC-EC-EARTH        | r12i1p1     | HIRHAM5           | v1      | 13.08%      | 13.08% |
| CNRM-CERFACS-CNRM-CM5 | r1i1p1      | RACMO22E          | v2      | 13.79%      | 13.79% |
| NCC-NorESM1-M         | r1i1p1      | REMO2015          | v1      | 2084        | 2.14%  |
| MPI-M-MPI-ESM-LR      | r1i1p1      | RACMO22E          | v1      | 2099        | 9.64%  |
| MOHC-HadGEM2-ES       | r1i1p1      | HIRHAM5           | v2      | 10.02%      | 10.02% |
| ICHEC-EC-EARTH        | r3i1p1      | HIRHAM5           | v2      | 12.99%      | 12.99% |
| NCC-NorESM1-M         | r1i1p1      | HIRHAM5           | v3      | 11.46%      | 11.46% |
| ICHEC-EC-EARTH        | r1i1p1      | HIRHAM5           | v1      | 14.21%      | 14.21% |
| ICHEC-EC-EARTH        | r3i1p1      | RACMO22E          | v1      | 2097        | 8.59%  |
| CNRM-CERFACS-CNRM-CM5 | r1i1p1      | HIRHAM5           | v2      | 14.9%       | 14.9%  |
| NCC-NorESM1-M         | r1i1p1      | RACMO22E          | v1      | 14.9%       | 14.9%  |
| MPI-M-MPI-ESM-LR      | r3i1p1      | REMO2015          | v1      | 2087        | 3.05%  |
| NCC-NorESM1-M         | r1i1p1      | COSMO-crCLIM-v1-1 | v1      | 2089        | 4.54%  |
| MPI-M-MPI-ESM-LR      | r1i1p1      | COSMO-crCLIM-v1-1 | v1      | 2095        | 7.4%   |
| MPI-M-MPI-ESM-LR      | r1i1p1      | HIRHAM5           | v1      | 14.48%      | 14.48% |
| MPI-M-MPI-ESM-LR      | r2i1p1      | COSMO-crCLIM-v1-1 | v1      | 2098        | 8.4%   |
| MOHC-HadGEM2-ES       | r1i1p1      | COSMO-crCLIM-v1-1 | v1      | 2083        | 1.49%  |
| CNRM-CERFACS-CNRM-CM5 | r1i1p1      | REMO2015          | v2      | 2090        | 4.42%  |
| IPSL-IPSL-CM5A-MR     | r1i1p1      | REMO2015          | v1      | 2076        | 2096   |
| MPI-M-MPI-ESM-LR      | r3i1p1      | COSMO-crCLIM-v1-1 | v1      | 2095        | 6.61%  |
| IPSL-IPSL-CM5A-MR     | r1i1p1      | RACMO22E          | v1      | 2089        | 4.31%  |
| ICHEC-EC-EARTH        | r12i1p1     | COSMO-crCLIM-v1-1 | v1      | 2093        | 6.02%  |

**Table S5.** Continuation of Tab. S5

| GCM                   | realization | RCM               | version | RCP 85      |        |
|-----------------------|-------------|-------------------|---------|-------------|--------|
|                       |             |                   |         | mostly gone | gone   |
| IPSL-IPSL-CM5A-MR     | r1i1p1      | HIRHAM5           | v1      | 2099        | 9.19%  |
| ICHEC-EC-EARTH        | r1i1p1      | COSMO-crCLIM-v1-1 | v1      | 10.19%      | 10.19% |
| ICHEC-EC-EARTH        | r3i1p1      | COSMO-crCLIM-v1-1 | v1      | 2094        | 6.34%  |
| CNRM-CERFACS-CNRM-CM5 | r1i1p1      | COSMO-crCLIM-v1-1 | v1      | 17.21%      | 17.21% |
| ICHEC-EC-EARTH        | r12i1p1     | HadREM3-GA7-05    | v1      | 2086        | 2.39%  |
| CNRM-CERFACS-CNRM-CM5 | r1i1p1      | HadREM3-GA7-05    | v2      | 2083        | 2.2%   |
| MOHC-HadGEM2-ES       | r1i1p1      | HadREM3-GA7-05    | v1      | 2075        | 2095   |
| MPI-M-MPI-ESM-LR      | r1i1p1      | HadREM3-GA7-05    | v1      | 2084        | 1.93%  |
| NCC-NorESM1-M         | r1i1p1      | HadREM3-GA7-05    | v1      | 2081        | 1.46%  |
| MOHC-HadGEM2-ES       | r1i1p1      | ALADIN63          | v1      | 2084        | 1.97%  |
| CNRM-CERFACS-CNRM-CM5 | r1i1p1      | WRF381P           | v2      | 10.18%      | 10.18% |
| MOHC-HadGEM2-ES       | r1i1p1      | WRF381P           | v1      | 2093        | 5.6%   |
| NCC-NorESM1-M         | r1i1p1      | WRF381P           | v1      | 2095        | 7.17%  |
| IPSL-IPSL-CM5A-MR     | r1i1p1      | WRF381P           | v1      | 12.13%      | 12.13% |
| MPI-M-MPI-ESM-LR      | r1i1p1      | ALADIN63          | v1      | 2092        | 6.14%  |
| ICHEC-EC-EARTH        | r12i1p1     | WRF381P           | v1      | 2096        | 7.77%  |
| CNRM-CERFACS-CNRM-CM5 | r1i1p1      | ALADIN63          | v2      | 2095        | 6.89%  |
| MPI-M-MPI-ESM-LR      | r1i1p1      | WRF381P           | v1      | 2100        | 9.95%  |
| NCC-NorESM1-M         | r1i1p1      | ALADIN63          | v1      | 2087        | 3.33%  |
| MPI-M-MPI-ESM-LR      | r2i1p1      | RCA4              | v1      | 10.03%      | 10.03% |
| NCC-NorESM1-M         | r1i1p1      | RCA4              | v1      | 11.12%      | 11.12% |
| ICHEC-EC-EARTH        | r3i1p1      | RCA4              | v1      | 14.1%       | 14.1%  |
| ICHEC-EC-EARTH        | r1i1p1      | RCA4              | v1      | 15.71%      | 15.71% |
| CNRM-CERFACS-CNRM-CM5 | r1i1p1      | RegCM4-6          | v2      | 2095        | 7.15%  |
| MPI-M-MPI-ESM-LR      | r3i1p1      | RCA4              | v1      | 11.18%      | 11.18% |
| MPI-M-MPI-ESM-LR      | r1i1p1      | RCA4              | v1a     | 2099        | 9.09%  |
| MOHC-HadGEM2-ES       | r1i1p1      | RCA4              | v1      | 2089        | 3.59%  |
| IPSL-IPSL-CM5A-MR     | r1i1p1      | RCA4              | v1      | 2095        | 7.11%  |
| ICHEC-EC-EARTH        | r12i1p1     | RCA4              | v1      | 12.74%      | 12.74% |
| CNRM-CERFACS-CNRM-CM5 | r1i1p1      | RCA4              | v1      | 17.04%      | 17.04% |
| ICHEC-EC-EARTH        | r12i1p1     | RegCM4-6          | v1      | 2092        | 5.88%  |
| NCC-NorESM1-M         | r1i1p1      | RegCM4-6          | v1      | 2090        | 4.66%  |
| MPI-M-MPI-ESM-LR      | r1i1p1      | RegCM4-6          | v1      | 2092        | 6.1%   |
| MOHC-HadGEM2-ES       | r1i1p1      | RegCM4-6          | v1      | 2078        | 2097   |

**Table S6.** Overview of projected year when GAG are gone (i.e. volume drops below 1% of the initial volume) or mostly gone (i.e. volume drops below 10% of the initial volume) of the 10 SSP585 and SSP126 ISIMIP3b GCM simulations utilized in this study. If a percentage value is given, the volume has not fallen below the corresponding threshold value in 2100 and the remaining glacier volume is given in comparison to 2011. The simulations marked in red are the ones with a future volume evolution that is closest to the multi-model median.

| GCM        | SSP 585     |       | SSP 126     |        |
|------------|-------------|-------|-------------|--------|
|            | mostly gone | gone  | mostly gone | gone   |
| CANESM5    | 2069        | 2084  | 10.28%      | 10.28% |
| CNRM-CM6   | 2077        | 2095  | 12%         | 12%    |
| CNRM-ESM2  | 2080        | 2098  | 12.97%      | 12.97% |
| EC-EARTH3  | 2069        | 2086  | 12.62%      | 12.62% |
| GFDL-ESM4  | 2091        | 5.23% | 25.9%       | 25.9%  |
| IPSL-CM6A  | 2073        | 2089  | 14.68%      | 14.68% |
| MIROC6     | 2078        | 2096  | 15.41%      | 15.41% |
| MPI-ESM1-2 | 2092        | 4.31% | 34.7%       | 34.7%  |
| MRI-ESM2-0 | 2073        | 2096  | 14.33%      | 14.33% |
| UKESM1     | 2060        | 2075  | 2070        | 1.57%  |
